## **Correction: The Chilling Effect: How Do Researchers React to Controversy?**

Joanna Kempner

Correction for:

Kempner J (2008) The chilling effect: How do researchers react to controversy? PLoS Med 5(11): e222. doi:10.1371/journal.pmed.0050222

An intermediate version of the interview guide was incorrectly included in Text S1 and published in the Supporting Information section. An updated version of the interview guide can be found in the corrected Text S1 below.

### **Supporting Information**

Corrected Text S1.

Protocols and Consent Forms

Found at doi:10.1371/journal.pmed.1000014.sd001 (450 KB DOC).

Citation: Kempner J (2009) Correction: The Chilling Effect: How Do Researchers React to Controversy? PLoS Med 6(1): e1000014. doi:10.1371/journal.pmed.1000014

Received: November 25, 2008; Accepted: November 25, 2008; Published: January 27, 2009.

Copyright: © 2009 Joanna Kempner. This is an open-access article distributed under the terms of the Creative Commons Attribution License, which permits unrestricted use, distribution, and reproduction in any medium, provided the original author and source are credited.
